## A developmental analysis of oligodendroglial integrins in primary cells: changes in $\alpha$ v-associated $\beta$ subunits during differentiation

Richard Milner and Charles ffrench-Constant\*

Wellcome/CRC Institute of Developmental Biology and Cancer, Tennis Court Road, Cambridge, CB2 1QR, UK and Department of Pathology, University of Cambridge, UK

\*Author for correspondence

### SUMMARY

We have examined the expression of integrins on primary oligodendroglial cells during the differentiation of the proliferative oligodendrocyte precursor (O-2A progenitor) cell to the postmitotic oligodendrocyte. Cells of the oligodendrocyte lineage expressed a limited repertoire of integrins:  $\alpha$ 6 $\beta$ 1 and  $\alpha$ v integrins including  $\alpha$ v $\beta$ 1,  $\alpha$ v $\beta$ 3 and  $\alpha$ v $\beta$ 5, as well as a potentially novel integrin  $\alpha$ v $\beta$ 80kDa. Integrin expression was developmentally regulated; during differentiation  $\alpha$ v $\beta$ 1 was reduced and  $\alpha$ v $\beta$ 5 upregulated. These results suggest that laminin and vitronectin are important extracellular matrix ligands for oligodendrocytes, and provide a rational explanation for previous observations

that RGD peptides inhibit the expression of myelin-specific genes. They also suggest a simple model by which switching of integrin  $\beta$  subunits might regulate differentiation. As chimeric  $\beta$ 1 integrins with a  $\beta$ 5 cytoplasmic domain support proliferation less well than normal  $\beta$ 1 integrins (Pasqualini and Hemler (1994), *J. Cell Biol.* 125, 447-460) the switch from  $\alpha$ v $\beta$ 1 to  $\alpha$ v $\beta$ 5 might play a key instructive role in the cessation of proliferation and subsequent differentiation.

Key words: oligodendrocyte, oligodendrocyte precursor, O-2A progenitor cell, integrin, proliferation, differentiation,  $\alpha$ 6 $\beta$ 1,  $\alpha$ v $\beta$ 1,  $\alpha$ v $\beta$ 5

### INTRODUCTION

A prominent feature of development in the vertebrate central nervous system (CNS) is myelination, a process that permits the rapid and efficient transmission of electrical impulses along the axon (Huxley and Stampfli, 1949). Myelination is carried out by oligodendrocytes, which are dispersed widely throughout the adult CNS. In contrast, oligodendrocyte precursors (O-2A progenitor cells) arise from restricted areas within the CNS (Warf et al., 1991; Pringle and Richardson, 1993) and, just as in other developmental systems such as the neural crest (Le Douarin, 1982; Marusich and Weston, 1991), it is the extensive proliferation and migration of cells during development that results in the widespread distribution of the differentiated cell type. A number of studies have examined the role of growth factors in the control of oligodendrocyte precursor cell proliferation, migration, survival and differentiation (for reviews see Kiernan and ffrench-Constant, 1993; Barres and Raff, 1994). An important question so far not addressed in such detail, however, is the role of environmental cues from the surrounding extracellular matrix (ECM), which have been shown to control cell behaviour in a wide range of other developmental systems (Adams and Watt, 1993).

One important family of molecules responsible for transducing signals from the ECM to the inside of the cell are the integrins (Hynes and Lander, 1992; Hemler, 1990; Ruoslahti, 1991; Hynes, 1992; Diamond and Springer, 1994). Integrins have been shown to play a role in the regulation of neural cell

behaviour during CNS development. Transfection of neuroblasts with a cDNA construct encoding an antisense RNA complementary to the  $\beta$ 1 subunit mRNA inhibits the migration of neural cells during development of the tectum in chick (Galileo et al., 1992). Later in development, the loss in response to laminin shown by retinal ganglion cell axons as they reach their tectal targets (Cohen et al., 1986) reflects, at least in part, downregulation of both the level and activity of the laminin integrin receptor  $\alpha$ 6 $\beta$ 1 (de Curtis et al., 1991; Neugebauer and Reichardt, 1991). Integrins have also been implicated specifically in oligodendrocyte differentiation. The ability of RGD peptides to inhibit adhesion and differentiation of oligodendrocytes on astrocyte-derived ECM (Cardwell and Rome, 1988a,b; Malek-Hedayat and Rome, 1994) suggests that integrins play a central role in controlling oligodendroglial behaviour, as many integrins recognize this peptide sequence in their ligands (Pytela et al., 1985a,b; Plow et al., 1985; Cheresch et al., 1989; Vogel et al., 1990; Busk et al., 1992; Koivunen et al., 1993). The mechanisms by which integrins exert these effects are, however, unknown.

The goal of this study was to characterize the different  $\alpha$  $\beta$  integrin heterodimers present on the cell surface during oligodendroglial differentiation in order to examine of the role of integrin-ECM interactions in this lineage. In order to do this, we have adopted a biochemical approach. Such an approach allows the association of any particular integrin subunit to be determined directly by immunoprecipitation of complexes under non-denaturing conditions that do not break up the  $\alpha$  $\beta$

heterodimers. It avoids the disadvantages of immunocytochemical studies or those analysing integrin mRNA expression, neither of which can examine subunit association satisfactorily. It does, however, require large numbers of purified primary cells, which are impossible to obtain in most developmental systems. We have taken advantage of the fact that oligodendrocyte precursors can be purified and grown in sufficiently large numbers in cell culture. In the presence of appropriate mitogens, these cells will migrate (Small et al., 1987; Noble et al., 1988; Armstrong et al., 1990) and proliferate (reviewed in Barres and Raff, 1994) and then differentiate into postmitotic, non-migratory oligodendrocytes, with the timing of this differentiation reflecting that seen *in vivo* (Raff et al., 1985; Dubois-Dalcq et al., 1986).

We find oligodendroglia express a limited repertoire of integrins of the  $\alpha 6$  and  $\alpha v$  families. While  $\alpha 6\beta 1$  expression is maintained throughout development, we observe changes in the  $\beta$  subunits associated with  $\alpha v$  such that  $\alpha v\beta 1$  is downregulated and  $\alpha v\beta 5$  upregulated during differentiation. As well as providing evidence of a role for  $\beta$  subunit switching during development, these results suggest a simple model by which integrin expression might play a role in the regulation of proliferation and differentiation in oligodendroglial cells.

## MATERIALS AND METHODS

### Cell culture

Purified oligodendrocyte precursors were obtained by the method of McCarthy and de Vellis (1980) with minor modifications. Briefly, cerebral cortices from postnatal day 0-2 Sprague-Dawley rats were dissected free of meninges, minced with fine scissors and incubated for 1 hour at 37°C in an enzymatic solution containing 30 U/ml papain (Worthington), 0.24 mg/ml L-cysteine (Sigma) and 40 µg/ml DNAase I type IV (Sigma) in 1 ml MEM-Hepes (as described in Barres et al., 1992). After incubation the supernatant was removed, 1 ml ovomucoid trypsin inhibitor solution added (containing 1 mg/ml trypsin inhibitor (Boehringer Mannheim), 50 µg/ml BSA (Sigma) and 40 µg/ml DNAase I type IV in L-15 media) for 3 minutes, supernatant removed again and a fresh 1 ml ovomucoid solution added. The tissue was then triturated seven times with a Pasteur pipette followed by four times with a 21-gauge needle before centrifugation in 10 ml DMEM supplemented with 10% FCS. Cells were cultured at a density of two brains per flask in DMEM supplemented with 10% FCS (GlobePharm) 4 mM L-glutamine (Sigma) and penicillin/streptomycin (Sigma) at 37°C and 7.5% CO<sub>2</sub>. The flasks (Falcon) were precoated with 5 µg/ml poly-D-lysine (Sigma). Media was changed every 3 days. Mouse cells were grown under identical conditions except for the replacement of 10% horse serum in place of 10% FCS. After a period of 10 days the cells separate into two layers: a basal monolayer consisting primarily of astrocytes and some fibroblasts, and a top layer of oligodendrocyte precursors and microglia. The loosely attached microglia were removed during a preliminary 2 hour shake on an orbital shaker (New Brunswick, G24) at 250 revs/minute, after which the supernatant and loose cells were removed and a fresh 10 ml of media added. The flasks were then shaken for 20-24 hours at 250 revs/minute. During this period, many 'top cells' consisting of oligodendrocyte precursors and remaining microglia are shaken free of the monolayer. Microglial contaminants were then removed by plating the supernatant cell mixture onto non-tissue culture Petri dishes (Media) for 20 minutes, during which time the adhesive microglia stick down while the oligodendrocyte precursors remain unattached. The remaining cell suspension was then centrifuged and resuspended in Sato media (DMEM supplemented with bovine insulin

(Sigma, 5 µg/ml), human transferrin (Sigma, 50 µg/ml), BSA V (Sigma, 100 µg/ml), progesterone (Sigma, 6.2 ng/ml), putrescine (Sigma, 16 µg/ml), sodium selenite (Sigma, 5 ng/ml), T3 (Sigma, 400 ng/ml), T4 (Sigma, 400 ng/ml), L-glutamine (Sigma, 4 mM), penicillin and streptomycin (Sigma) and 0.5% FCS) and plated onto poly-ornithine-coated six-well plates (Nunc) or 100 mm Petri dishes (Nunc). The purity of the resulting cell suspension was assessed by morphology as greater than 95% oligodendroglial cells (oligodendrocytes and precursors) at day 1. In this analysis, process-bearing oligodendroglia could be distinguished from fibroblast-like astrocytes and microglia. In secondary culture, precursor cells constitutively differentiate into oligodendrocytes. We confirmed this by immunostaining with a monoclonal antibody (Ranscht et al., 1982) against the oligodendrocyte-specific marker galactocerebroside (GalC) (Raff et al., 1978). We found that the cells in these cultures were less than 10% GalC+ after 4 hours (i.e. more than 90% precursor cells) but greater than 80% GalC+ at day 7 and greater than 95% GalC+ by day 10. In our experiments to examine oligodendrocyte integrins, secondary cultures were maintained for 7 days before analysis, except in the case of the developmental time course experiments in which some cultures were grown for up to 26 days.

Astrocytes were obtained by removing all 'top cells' from a flask and using the basal layer of astrocytes left behind. Fibroblasts were obtained by performing a papain dissociation of meninges (as above) and then culturing the cells in DMEM supplemented with 10% FCS and 4 mM L-glutamine and penicillin and streptomycin. The STO mouse embryonic fibroblast cell line was maintained in the same media.

### Antibodies

In immunoprecipitations and western blots, the antibodies were generous gifts from the following: (1) monoclonals; GoH3 (rat IgG1, anti- $\alpha 6$ ) and 1A10 (mouse IgG1, anti- $\alpha 6A$ ) from Dr Arnaud Sonnenberg, Amsterdam, Holland (Sonnenberg et al., 1987, Hogervorst et al., 1993); F11 (mouse IgG1, anti- $\beta 3$ ) from Dr Michael Horton, ICRF St. Bartholomews, London (Helfrich et al., 1992); 346-11A (rat IgG1, anti- $\beta 4$ ) from Dr S. Kennel, Oak Ridge, Tennessee (Kennel et al., 1989); P3G2 (mouse IgG1, anti- $\alpha v\beta 5$ ) from Dr David Cheresch, Scripps Research Institute, San Diego (Wayner et al., 1991) and (2) polyclonals; anti- $\alpha 1$ , anti- $\alpha 2$ , anti- $\alpha 3$ , anti- $\alpha 4$ , anti- $\alpha 5$  and anti- $\alpha v$  from Dr Guido Tarone, Milan, Italy, anti- $\alpha 6A$  (6845), anti- $\alpha 6B$  (382) and anti- $\beta 6$  (6830 and 6840) from Dr Vito Quaranta, Scripps Research Institute, San Diego (Cooper et al., 1991, Tamura et al., 1991, Sheppard et al., 1990), anti- $\alpha 8$  from Drs Robert Pytela and Lynn Schnapp, University of California, San Francisco; anti- $\beta 1$  from Dr Richard Hynes, MIT, Boston (Marcantonio and Hynes, 1988); anti- $\beta 3$  from Dr Kristine Venstrom, University of California, San Francisco. All polyclonal antibodies were raised against peptides derived from the cytoplasmic domains of the individual integrin subunits.

### Cell surface labelling and immunoprecipitation

Cell surface molecules were labelled with biotin by removing growth media, washing the cell layer twice with PBS and then labelling with 0.1 mg/ml NHS-LC-Biotin (Pierce) in PBS at 37°C in 7.5% CO<sub>2</sub> for 1 hour. Cell monolayers were then washed three times with cell wash buffer (50 mM Tris-HCL pH 7.5, 0.15 M NaCl, 1 mM CaCl<sub>2</sub>, 1 mM MgCl<sub>2</sub>) and harvested with a rubber policeman before being washed twice more in suspension. Cells were then lysed in 1% NP40 extraction buffer (cell wash buffer plus 300 µg/ml PMSF, 1 µg/ml pepstatin A, 2 µg/ml aprotinin and 4 µg/ml leupeptin) for 30 minutes on ice, followed by trituration and centrifugation at 14,000 revs/minute at 4°C to remove the insoluble fraction. The supernatants were then pre-cleared by two sequential 2 hour incubations with 30 µl protein A-sepharose (Pharmacia) and 4 µl non-immune rabbit serum/ml cell lysate. Immunoprecipitations were carried out overnight at 4°C on a rotating platform using 1 µl rabbit antisera/250 µl cell lysate. Where

rat or mouse monoclonal antibodies were used, rabbit anti-rat or rabbit anti-mouse antisera was also added to the tube. This linking antisera was used at the same concentration as the primary antisera (1 in 250), while the monoclonal antibodies were used at the following concentrations: GoH3 (supernatant), 4 in 250; 346-11A (supernatant), 4 in 250; F11 (ascites) 1 in 250 and P3G2 (ascites) 1 in 250. The immune complexes were collected by incubation with 30  $\mu$ l protein A-sepharose beads for 2 hours after which time the beads were extensively washed five times in immunoprecipitation wash buffer (identical to the cell wash buffer except for 0.5 M NaCl and the addition of 0.1% Tween-20). The immunodepletion experiment was performed by four sequential rounds of incubation with either GoH3 and rabbit anti-rat antisera or non-immune rabbit antisera and removal of complexes with protein A-sepharose beads. After the last round of immunodepletion, the remaining lysate was immunoprecipitated with antisera against the  $\beta$ 1 subunit as described above. Integrins were separated from the beads by boiling in non-reducing SDS sample buffer for 5 minutes before being analysed by SDS-PAGE on a 7.5% resolving gel and 4% stacking gel under non-reducing conditions. Proteins were then electroblotted for 3 hours onto nitrocellulose (Hybond-C, Amersham), blocked overnight with 3% B.S.A. in TBS (10 mM Tris-HCL, 0.15 NaCl, pH 8.0) containing 0.1% Tween-20 and detected with streptavidin-HRP (ECL detection system, Amersham) for 1 hour according to manufacturers instructions. In those experiments where we obtained estimates of the expression levels of the  $\beta$ 1 and  $\beta$ 5 subunits, band intensity was measured by scanning the film with a Microtek scanner linked to a Macintosh computer running Image (NIH) and expressing the result as a ratio of  $\alpha$ v intensity within each immunoprecipitate.

For the  $\alpha$ 6 western blotting experiment, cells were harvested and boiled immediately in SDS sample buffer for 5 minutes. Proteins were then separated on SDS-PAGE under non-reducing conditions, electroblotted onto nitrocellulose as above, and the blots were blocked overnight with 3% BSA in TBS plus 0.1% Tween-20. The  $\alpha$ 6A subunit was detected using antisera against the  $\alpha$ 6A subunit (6845) diluted 1:500 in TBS containing 5% normal goat serum followed by incubation with anti-rabbit-HRP (Amersham), diluted 1:1000 in TBS containing 5% normal goat serum.

## RESULTS

### Analysis of $\beta$ 1 integrins using biotin labelling

In order to analyse integrin expression of cells grown in culture, cell surface molecules were labelled with biotin,

membranes lysed with 1% NP40 and immunoprecipitations carried out using a panel of antibodies directed against individual  $\alpha$  or  $\beta$  subunits. As a positive control, initial experiments were carried out on astrocytes and fibroblasts, cells known to express a range of  $\beta$ 1 integrins (Tawil et al., 1993). Using a panel of anti- $\alpha$  antisera, we found that astrocytes express predominantly  $\alpha$ 3 $\beta$ 1 and  $\alpha$ 6A $\beta$ 1 and minor levels of  $\alpha$ 1 $\beta$ 1 and  $\alpha$ 5 $\beta$ 1, while fibroblasts express predominantly  $\alpha$ 5 $\beta$ 1 with low levels of  $\alpha$ 1 $\beta$ 1 and  $\alpha$ 3 $\beta$ 1 (Fig. 1). In order to demonstrate that the  $\alpha$ 2 and  $\alpha$ 4 subunits could be detected using biotin labelling, immunoprecipitations were also performed on JM, a human 'T' cell line obtained from the American Tissue Culture Collection (ATCC). Both these antisera immunoprecipitated bands of the predicted molecular weights for the  $\alpha$ 2,  $\alpha$ 4 and  $\beta$ 1 subunits (data not shown).

Having established that our biotin-labelling protocol could identify the different integrin subunits, initial experiments were aimed at characterizing the integrin expression profile of differentiated oligodendrocytes. Rat oligodendrocyte precursors were obtained by mechanical shaking of mixed glial cultures followed by microglial subtraction. In secondary culture these cells constitutively differentiate into oligodendrocytes. Using galactocerebroside (GalC) as a marker of differentiation into oligodendrocytes, our secondary cultures were <10% GalC at day 1 postshake, increasing to >80% GalC at day 7 and >95% at day 10. Over the same time period, the cultured oligodendroglial cells changed their morphology from a simple bipolar or tripolar phenotype to a complex branching pattern typical of oligodendrocytes in culture (Raff et al. 1978).

Just like the astrocytes and fibroblasts, we found that oligodendrocytes expressed  $\beta$ 1 integrins. Anti- $\beta$ 1 antiserum immunoprecipitated three bands which run at 140, 130 and 110 $\times$ 10<sup>3</sup>  $M_r$  under non-reduced conditions on SDS-PAGE (Fig. 2A) The molecular weight of the lowest band and the observation that it shifts up to 130 $\times$ 10<sup>3</sup>  $M_r$  upon reduction strongly suggest this is the  $\beta$ 1 subunit. In agreement with previous observations (Malek-Hedayat and Rome, 1994), we found that the oligodendrocyte  $\beta$ 1 band ran at a lower molecular weight than the  $\beta$ 1 subunit expressed by either astrocytes or fibroblasts.

### Integrin $\alpha$ subunit expression on oligodendrocytes

In order to characterize the  $\alpha$  subunits associated with oligo-

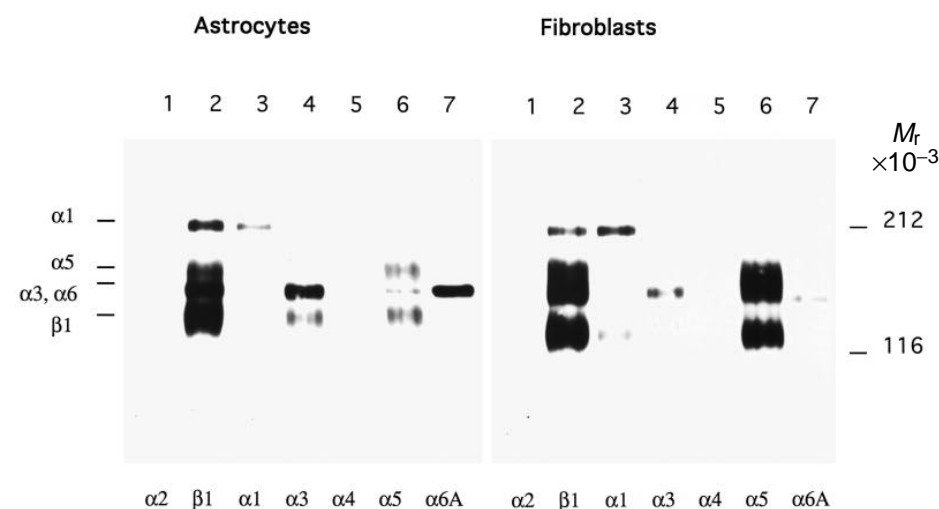

**Fig. 1.** Analysis of  $\beta$ 1 integrins on astrocytes and fibroblasts. Immunoprecipitations of biotin-labelled cell surface proteins were performed as described in Materials and methods, after which the proteins were separated on non-reducing gels. The left-hand panel shows astrocytes immunoprecipitated with the antisera shown below the figure, while the right-hand panel shows the same analysis performed on fibroblasts. Note that astrocytes express predominantly  $\alpha$ 3 $\beta$ 1 and  $\alpha$ 6A $\beta$ 1, with low levels of  $\alpha$ 5 $\beta$ 1 and  $\alpha$ 1 $\beta$ 1. Fibroblasts express predominantly  $\alpha$ 5 $\beta$ 1 and low levels of  $\alpha$ 1 $\beta$ 1 and  $\alpha$ 3 $\beta$ 1.  $M_r$  markers are shown on the right side of both gels ( $\times 10^{-3}$ ).

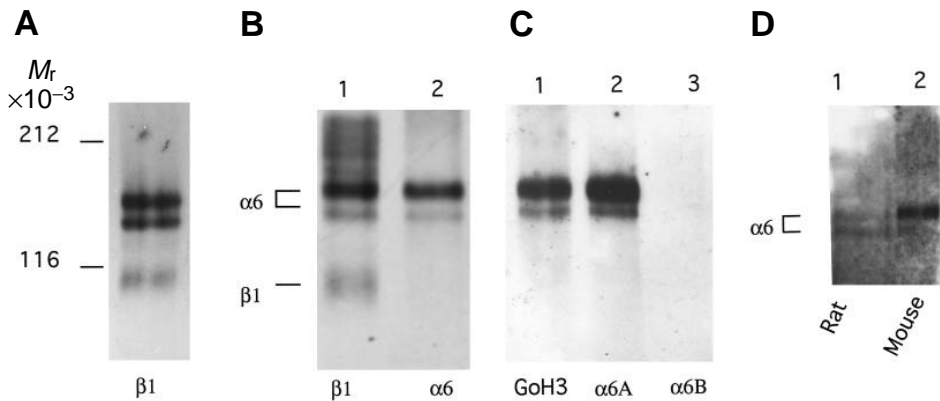

**Fig. 2.** (A)  $\beta 1$  integrin expression on rat oligodendrocytes. Immunoprecipitations of biotin-labelled cell surface proteins were performed as described in Materials and methods, after which the proteins were separated on non-reducing gels. Note that 3 bands are pulled down; the lowest band corresponds to  $\beta 1$  as discussed in the text. (B)  $\beta 1$  integrin expression on mouse oligodendrocytes. Immunoprecipitations were performed with antiserum against  $\beta 1$  (lane 1) and the GoH3 monoclonal antibody against  $\alpha 6$  (lane 2) and run under non-reducing conditions. Note that both the  $\alpha$  subunits

associated with  $\beta 1$  also immunoprecipitate with the anti- $\alpha 6$  antibody. (C) Expression of the alternatively spliced forms of  $\alpha 6$  in mouse oligodendrocytes. Immunoprecipitations were performed with the GoH3 monoclonal antibody (lane 1) and with antisera against  $\alpha 6A$  (lane 2) and  $\alpha 6B$  (lane 3), and then run under non-reducing conditions. GoH3 would be expected to immunoprecipitate both forms of  $\alpha 6$ ; however, note that the splice-specific antisera show that  $\alpha 6A$  but not  $\alpha 6B$  is expressed by the oligodendrocytes. (D) Western blot analysis of  $\alpha 6$  expression on rat and mouse oligodendrocytes. Oligodendrocytes were boiled in SDS-sample buffer immediately after harvesting, separated by SDS-PAGE and then electroblotted onto nitrocellulose prior to detection with the  $\alpha 6A$  antiserum. Note that both rat and mouse cells express two forms of  $\alpha 6A$ .

oligodendrocyte  $\beta 1$  integrin, we performed immunoprecipitation analysis using a panel of antisera raised against the cytoplasmic domains of  $\alpha 1$ ,  $\alpha 2$ ,  $\alpha 3$ ,  $\alpha 4$  and  $\alpha 5$ . All of these well-characterized  $\alpha$  subunits associate with  $\beta 1$  (Hynes, 1987). In contrast to the results with astrocytes and fibroblasts, immunoprecipitation of oligodendrocytes with these antibodies failed to produce any bands on the gel (data not shown). As all of these antisera do pull down bands in other cell types (Fig. 1 and data not shown), we conclude that oligodendrocytes do not express significant levels of  $\alpha 1$ ,  $\alpha 2$ ,  $\alpha 3$ ,  $\alpha 4$  and  $\alpha 5$  on their cell surface.

Five other  $\alpha$  subunits have been described as associating with  $\beta 1$  integrin;  $\alpha 6$ ,  $\alpha 7$ ,  $\alpha 8$ ,  $\alpha 9$  and  $\alpha v$  (Hemler et al., 1988; Song et al., 1992; Bossy et al., 1991; Palmer et al., 1993; Bodary and McLean, 1990; Vogel et al., 1990). We were able to examine  $\alpha 6$ ,  $\alpha 8$  and  $\alpha v$  directly in this study. In order to examine  $\alpha 6$  expression, we used a monoclonal antibody (GoH3) which recognizes mouse  $\alpha 6$ . Just like the rat cells, mouse oligodendrocytes immunoprecipitated with the anti- $\beta 1$  antiserum gave a pattern of three bands at 140, 130 and  $110 \times 10^3 M_r$  under non-reducing conditions. Fig. 2B shows that the anti- $\alpha 6$  antibody gave an identical pattern of bands to that seen with the anti- $\beta 1$  antiserum. These results show that oligodendrocytes express  $\alpha 6\beta 1$  integrins.

Previous work has shown that there are two forms of the  $\alpha 6$  subunit that arise from alternative splicing of the cytoplasmic domain (Hogervorst et al., 1991; Cooper et al., 1991). Using antisera specific for the two forms, we found that oligodendrocytes express  $\alpha 6A$  but not  $\alpha 6B$  (Fig. 2C). We were surprised to find that the two  $\alpha$  subunits running  $10 \times 10^3 M_r$  apart were both  $\alpha 6A$ . One possibility is that the lower band represented a degradation product. In order to address this question, oligodendrocytes were rapidly harvested within 2 minutes and immediately boiled in SDS-sample buffer to inactivate any protease activity. Samples were then separated on SDS-PAGE and western blotted using antibodies specific for the  $\alpha 6A$  subunit. We found that both rat and mouse oligodendrocytes gave an identical pattern of  $\alpha 6$  bands as the immunoprecipitation experiments (Fig. 2D), suggesting that the  $\alpha 6$  het-

erogeneity is not a result of degradation but represents a real heterogeneity of  $\alpha 6$  at the oligodendrocyte cell surface.

Because the  $\alpha 6$  integrin subunit is known to associate with both  $\beta 1$  and  $\beta 4$  subunits (Hemler et al., 1989; Kajiji et al., 1989), we investigated the possibility that oligodendrocytes might express  $\alpha 6\beta 4$  in addition to  $\alpha 6\beta 1$ . However, immunoprecipitations performed with an anti- $\beta 4$  monoclonal antibody failed to show any bands, even when the oligodendroglia were left for up to 2 weeks in secondary culture. Therefore, we conclude that the oligodendrocytes in this system express  $\alpha 6$  only in association with  $\beta 1$ .

Immunoprecipitation with antiserum raised against the cytoplasmic domain of  $\alpha v$  showed that oligodendrocytes also expressed  $\alpha v$  integrins. Three bands were observed:  $140 \times 10^3 M_r$ , the expected size for the  $\alpha v$  subunit and two other bands at 80 and  $90 \times 10^3 M_r$  (Fig. 3). Of these two bands, the  $80 \times 10^3 M_r$  band was dominant. As  $\alpha v$  has been described as associating with a range of  $\beta$  subunits ( $\beta 1$ ,  $\beta 3$ ,  $\beta 5$ ,  $\beta 6$  and  $\beta 8$ ), it seemed likely that these lower bands were  $\beta$  subunits. Further experiments supported this interpretation. First, immunopre-

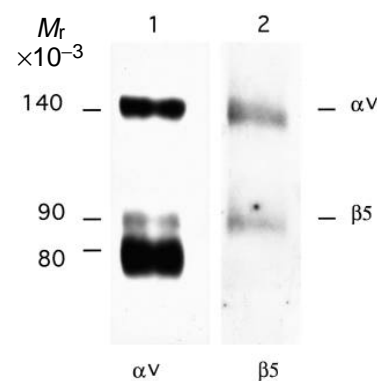

**Fig. 3.** The  $\alpha v$  expression profile of rat oligodendrocytes. Immunoprecipitations of biotin-labelled cell surface proteins were performed as described in Materials and methods, after which the proteins were separated on non-reducing gels.  $\alpha v$  integrins were immunoprecipitated with anti- $\alpha v$  antiserum (lane 1) and the P3G2 antibody against  $\alpha v\beta 5$  (lane 2).

Note that the anti- $\alpha v$  antiserum pulls down 3 bands, with  $\alpha v$  running at  $140 \times 10^3 M_r$  and the two associated  $\beta$  subunits at  $90$  and  $80 \times 10^3 M_r$ . The  $\alpha v\beta 5$  immunoprecipitation identifies the  $90 \times 10^3 M_r$  band as  $\beta 5$ .

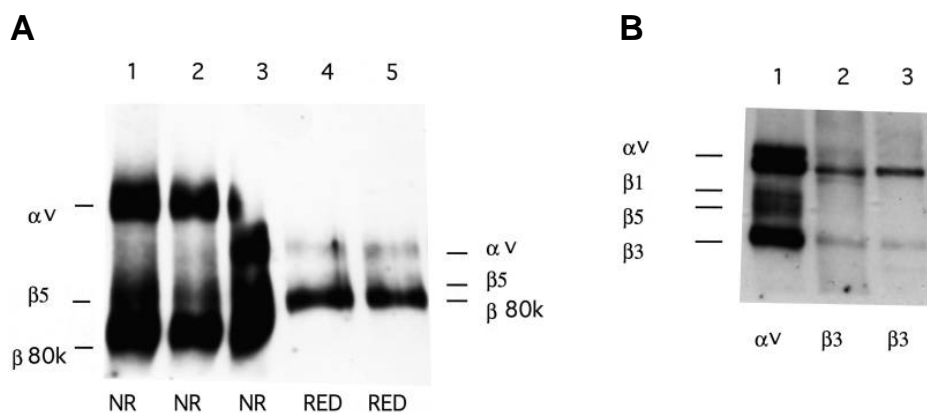

**Fig. 4.** Characterization of the  $80 \times 10^3 M_r$  subunit associated with  $\alpha v$  on oligodendrocytes. (A) Identical  $\alpha v$  immunoprecipitates from biotin-labelled oligodendrocytes (as shown in Fig. 3, lane 1) run under non-reducing (lanes 1-3) and reducing (lanes 4-5) conditions. These were run side by side so as to demonstrate the shift in mobility. Note that upon reduction the  $80 \times 10^3 M_r$   $\beta$ -subunit shifts in mobility by at least  $10 \times 10^3 M_r$ , as it now runs just above non-reduced  $\beta 5$  ( $90 \times 10^3 M_r$ ). (B) The immunoprecipitations with  $\alpha v$  (lane 1) run alongside immunoprecipitations with

an anti- $\beta 3$  antiserum (lane 2) and F11, a monoclonal antibody against  $\beta 3$  (lane 3) under non-reducing conditions. Note that oligodendrocytes express  $\alpha v \beta 3$  and that  $\beta 3$  runs within the dominant  $80 \times 10^3 M_r$  band in the  $\alpha v$  immunoprecipitates.

precipitation using a monoclonal anti- $\alpha v \beta 5$  (P3G2) brought down the  $90 \times 10^3 M_r$  band and the  $\alpha v$  subunit (Fig. 3), confirming that oligodendrocytes express  $\alpha v \beta 5$  and that the  $90 \times 10^3 M_r$  band was  $\beta 5$ . Second, upon reduction, the  $80 \times 10^3 M_r$  band follows the expected behaviour of an integrin  $\beta$  subunit by shifting up ( $10$ - $15 \times 10^3 M_r$ ) to a higher apparent molecular weight. This is shown in Fig. 4A, in which the same  $\alpha v$  immunoprecipitation has been run in either non-reduced or reducing conditions. Based on molecular weight, the possible candidates for this putative  $80 \times 10^3 M_r$   $\beta$  subunit are  $\beta 3$ ,  $\beta 6$ ,  $\beta 8$  or a novel  $\beta$  subunit. Immunoprecipitations with anti- $\beta 6$  antiserum were negative. The previous observation that the  $\beta 8$  subunit shifts up only marginally ( $2$ - $3 \times 10^3 M_r$ ) upon reduction (Moyle et al., 1991) makes  $\beta 8$  an unlikely candidate for the  $80 \times 10^3 M_r$  band. Immunoprecipitations using either of two anti- $\beta 3$  antibodies, one an antiserum and the other the F11 monoclonal antibody, did pull down a pattern of two bands corresponding to  $\alpha v$  and the  $80 \times 10^3 M_r$  band, but the  $80 \times 10^3 M_r$  band was very faint when compared with the intensity seen in the  $\alpha v$  immunoprecipitation (Fig. 4B). We conclude therefore that oligodendrocytes do express  $\alpha v \beta 3$  but think it likely that other  $\beta$  subunits also contribute to the  $80 \times 10^3 M_r$  band.

A previous study published as this work was being completed has described  $\alpha 8 \beta 1$  on the surface of oligodendrocytes (Malek-Hedayat and Rome, 1994). However, in our hands, experiments performed with an anti- $\alpha 8$  antiserum on

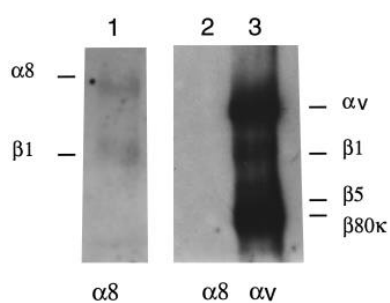

**Fig. 5.** Lack of  $\alpha 8$  expression on oligodendrocytes. Lanes 2 and 3 show a biotin-labelled lysate from rat oligodendrocytes immunoprecipitated with anti- $\alpha 8$  and anti- $\alpha v$  antisera respectively. Lane 1 shows a positive control for the anti- $\alpha 8$  antiserum using a mouse embryonic fibroblast cell line (STO cells). The oligodendrocyte lanes are deliberately overexposed, but note that no  $\alpha 8$  bands are seen.

oligodendrocytes of three different ages (2, 7 and 20 days in secondary culture) failed to immunoprecipitate any bands in this system (Fig. 5).

As reagents against  $\alpha 7$  and  $\alpha 9$  integrins were not available to us, we took a different approach to determine whether these or any novel  $\beta 1$ -associated integrins were expressed on oligodendrocytes. We performed immunodepletion experiments in which cell surface extracts from oligodendrocytes were depleted of  $\alpha 6 \beta 1$  integrins by four sequential rounds of immunoprecipitation with the G0H3 monoclonal antibody.

Following these steps, immunoprecipitation with anti- $\beta 1$  antiserum was performed. As shown in Fig. 6, no  $\beta 1$  integrins were detectable following these immunodepletion experiments while the cell lysate exposed to control immunodepletions gave a pattern identical to that seen with the normal  $\beta 1$  control. This result confirms that  $\alpha 6 \beta 1$  is the major  $\beta 1$  integrin expressed

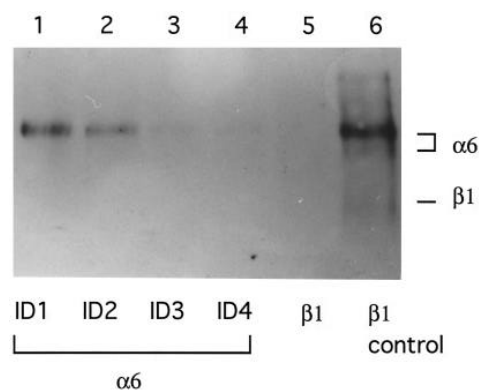

**Fig. 6.**  $\alpha 6$  immunodepletion of a mouse oligodendrocyte lysate. Biotin-labelled mouse oligodendrocyte lysate was immunodepleted of  $\alpha 6$  integrins by sequential immunoprecipitations with the monoclonal antibody G0H3 as described in materials and methods. Lanes 1-4 show the proteins removed at each round of immunoprecipitation. Lane 5 shows the subsequent immunoprecipitation with an anti- $\beta 1$  antiserum while lane 6 shows the same  $\beta 1$  immunoprecipitation performed in the mock-depleted control. All gels were run under non-reducing conditions. Note that the  $\alpha 6$  immunodepletion removed all detectable  $\beta 1$  integrins from the oligodendrocyte lysate.

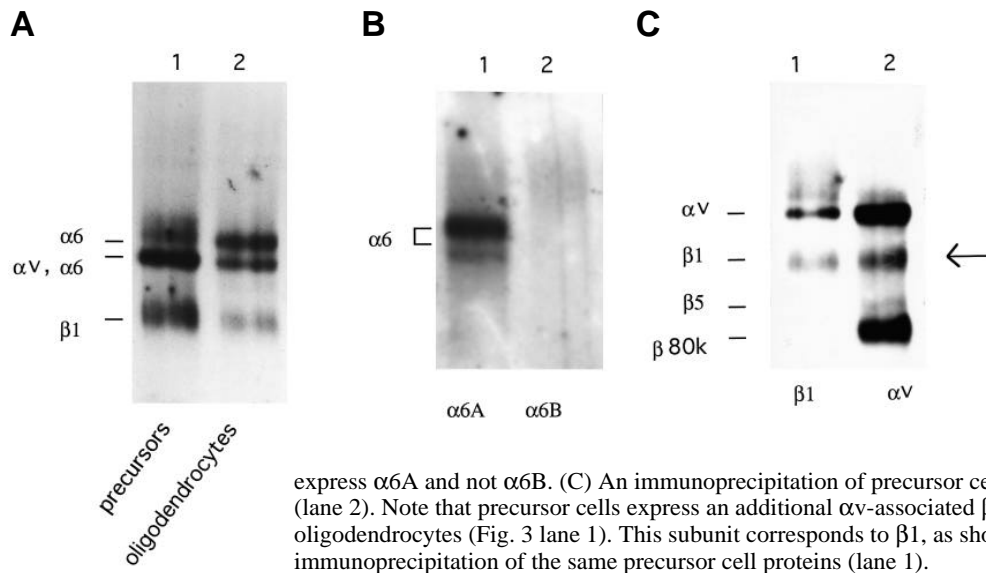

**Fig. 7.** Integrin expression by oligodendrocyte precursors. (A)  $\beta 1$  immunoprecipitates of biotin-labelled cell surface proteins from oligodendrocyte precursors (lane 1) and mature oligodendrocytes (lane 2) run under non-reducing conditions. The pattern of bands is identical, but note that the relative intensity of the upper two bands is different. (B) Immunoprecipitations of precursor cell proteins with the splice-specific  $\alpha 6A$  and  $\alpha 6B$  antisera run under the same conditions as A. Note that, just as in the oligodendrocytes, precursors

express  $\alpha 6A$  and not  $\alpha 6B$ . (C) An immunoprecipitation of precursor cell proteins with the anti- $\alpha v$  antiserum (lane 2). Note that precursor cells express an additional  $\alpha v$ -associated  $\beta$  subunit (arrow) as compared to the oligodendrocytes (Fig. 3 lane 1). This subunit corresponds to  $\beta 1$ , as shown by the neighbouring  $\beta 1$  immunoprecipitation of the same precursor cell proteins (lane 1).

on oligodendrocytes and suggests that no other  $\beta 1$  integrins are expressed at a significant level.

#### Integrin expression on oligodendrocyte precursors (0-2A progenitor cells)

These results show that oligodendrocytes express at least three integrins  $\alpha 6\beta 1$ ,  $\alpha v\beta 3$  and  $\alpha v\beta 5$ . As one of the major goals of this study was to determine the role of integrins in the differentiation of oligodendrocyte precursor cells, we next analysed integrins on oligodendrocyte precursors. This analysis was performed on secondary oligodendroglia cultures soon after shaking, at which time less than 10% of the cells were GalC-positive oligodendrocytes and the vast majority of the cells were therefore oligodendrocyte precursors.

As with the oligodendrocytes, we found precursors expressed  $\alpha 6$  and  $\alpha v$  integrins (Fig. 7) but were negative for  $\alpha 1$ ,  $\alpha 2$ ,  $\alpha 3$ ,  $\alpha 4$ ,  $\alpha 5$  and  $\alpha 8$ . The expression pattern of  $\alpha 6$  integrin on precursors was similar to that of oligodendrocytes with two bands present. Previous work examining  $\alpha 6A$  and  $\alpha 6B$  has suggested that these forms are developmentally regulated (Cooper et al., 1991; Hierck et al., 1993). In order to determine whether a similar regulation occurs during oligodendrocyte differentiation, we performed immunoprecipitation analysis of precursors or differentiated oligodendrocytes using  $\alpha 6A$  and  $\alpha 6B$  antisera. As shown in Fig. 7B, we only observed  $\alpha 6A$  forms in precursors, just as we had found in oligodendrocytes.  $\alpha 6B$  forms were never observed in the oligodendroglial lineage cells examined in this study.

In contrast to the situation with  $\alpha 6$ , we observed a different pattern of integrin expression when  $\alpha v$  immunoprecipitation experiments were performed on oligodendrocyte precursors.  $\alpha v$  was expressed on precursor cells as well as oligodendrocytes, but the pattern of associated  $\beta$  subunits was different. The  $90 \times 10^3 M_r$   $\beta 5$  band was barely visible, while a new band was seen at  $110 \times 10^3 M_r$  in the precursor cells. Two lines of evidence suggest that this band represents  $\beta 1$  associated with  $\alpha v$ . First, this band co-migrated with the  $\beta 1$  band observed in a  $\beta 1$  immunoprecipitation of precursor cells (Fig. 7C). Second, in  $\beta 1$  immunoprecipitation experiments, we consistently observed an increase in the intensity of the lower  $\alpha$  band in

precursor cells as compared with differentiated oligodendrocytes. This band is formed by both  $\alpha 6$  (lower) and  $\alpha v$  which co-migrate (Fig. 7A). An increase in intensity of this band would therefore be predicted in the  $\beta 1$  immunoprecipitations of precursor cells if  $\alpha v$  as well as  $\alpha 6$  was now being immunoprecipitated in association with  $\beta 1$ .

To investigate these changes in the  $\beta$  subunits associated with  $\alpha v$  further, we analysed a developmental time course experiment in which oligodendrocyte precursor cultures were left for up to 15 days in culture. As shown in Fig. 8, the levels of the  $80 \times 10^3 M_r$  band containing  $\beta 3$  remained at a high level throughout this experiment. The levels of  $\beta 1$  and  $\beta 5$  changed as expected; at day 1  $\alpha v\beta 1$  expression is high while  $\alpha v\beta 5$  is barely detectable, by day 4  $\alpha v\beta 1$  is downregulated and by day

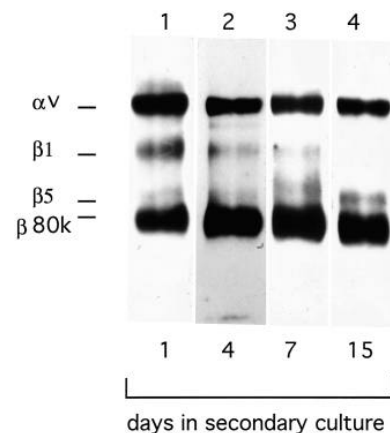

**Fig. 8.** A developmental time course of  $\alpha v$  integrins on differentiating oligodendrocytes. Immunoprecipitations using the anti- $\alpha v$  antiserum were performed on biotin-labelled cell surface proteins after the precursor cells had been left for 1-15 days in secondary culture and then run under non-reducing conditions. Note that the  $\alpha v$ -associated  $\beta 1$  is lost from differentiating oligodendroglia between 7 and 15 days, while  $\alpha v$ -associated  $\beta 5$  increases in amount over the time period examined.  $\beta 80kDa$ , in contrast, shows no change in intensity.

7 when greater than 80% of the cells have differentiated into oligodendrocytes  $\alpha v\beta 5$  predominates over  $\alpha v\beta 1$ . By day 15,  $\alpha v\beta 1$  has virtually disappeared while  $\alpha v\beta 5$  levels remain elevated. This reciprocal change in  $\beta 1$  and  $\beta 5$  was observed in 5 consecutive experiments left for 7 days in secondary culture. The  $\beta 1$  band was reduced in intensity by a factor of  $2.06 \pm 1.2$  while the  $\beta 5$  band was increased by a factor of  $3.27 \pm 2.27$ , giving an estimated 6-fold increase in the  $\beta 5/\beta 1$  ratio. In cultures left for 12 days or longer, the reduction in  $\beta 1$  becomes progressively more marked, with reductions by factors of 3 (12 days), 13 (15 days) and 21 (26 days) obtained in three separate experiments. As a result, the  $\beta 5/\beta 1$  ratio increased at least 24-fold by day 15. These results show that the downregulation of  $\alpha v\beta 1$  and increase in  $\alpha v\beta 5$  occurs as the precursor cells differentiate and change their migratory, proliferative phenotype for a non-motile, postmitotic phenotype.

## DISCUSSION

Two major conclusions emerge from this study of integrins on oligodendroglial cells. First, oligodendroglial cells express a limited repertoire of integrins comprising  $\alpha 6\beta 1$  and  $\alpha v$ -associated integrins. Second, the expression of integrins is developmentally regulated;  $\alpha v\beta 1$  is downregulated and  $\alpha v\beta 5$  upregulated in association with differentiation in this lineage.

### Patterns of integrin expression on oligodendroglial cells

Oligodendrocytes and astrocytes form the two major classes of glial cells within the vertebrate CNS. Previous work has shown that astrocytes express  $\alpha 6\beta 1$  (Tawil et al., 1993). Our finding that oligodendroglia also express  $\alpha 6\beta 1$  suggests that there is wide-spread expression of this  $\alpha$  subunit in the CNS. The absence of  $\alpha 1-5$  in oligodendrocytes is in contrast with astrocytes where we detected  $\alpha 1$ ,  $\alpha 3$  and  $\alpha 5$ . Interestingly, however, oligodendrocytes do resemble Schwann cells, the myelinating cell of the peripheral nervous system, in their expression of  $\alpha 6$  as the dominant  $\beta 1$  integrin (Einheber et al., 1993). The similar pattern of integrins in the two myelinating cells is of interest as the cells have otherwise very different phenotypes – oligodendrocytes are multipolar cells that form many myelin sheaths and lack a basal lamina while Schwann cells form only a single myelin sheath as well as a basal lamina. In addition to  $\alpha 6\beta 1$ , myelinating Schwann cells also express  $\alpha 6\beta 4$  (Einheber et al., 1993; Feltri et al., 1994; Niessen et al., 1994). We found no evidence for  $\alpha 6\beta 4$  in this study; however our purified oligodendrocyte cultures are neuron-free and so myelin sheath formation would not be expected.

Previous studies on the  $\alpha 6$  subunit show alternative splicing in the cytoplasmic domain producing two different forms,  $\alpha 6A$  and  $\alpha 6B$  (Hogervorst et al., 1991; Cooper et al., 1991). These two isoforms are regulated both in a temporal and spatial fashion.  $\alpha 6B$  is the only form expressed in blastocyst-stage mouse embryos (Hierck et al., 1993), while adult tissues express both  $\alpha 6A$  and  $\alpha 6B$  in cell-type-specific patterns (Tamura et al., 1991; Hogervorst et al., 1993). This observation suggests that differentiation is associated with an increase in  $\alpha 6A$ . In support of this, blastocyst or ES cells allowed to differentiate *in vitro* upregulate  $\alpha 6A$  so as to coexpress both  $\alpha 6A$  and  $\alpha 6B$  (Cooper et al., 1991; Hierck et al., 1993). These

observations prompted us to analyse the  $\alpha 6A$ - $\alpha 6B$  expression pattern in oligodendroglia at different stages of development in order to determine whether there was any evidence for developmental control. We found that both precursors and differentiated oligodendrocytes expressed the  $\alpha 6A$  but not the  $\alpha 6B$  form. This does not preclude the possibility that  $\alpha 6B$  is expressed earlier in the oligodendroglial lineage, prior to the developmental point at which we were able to obtain large numbers of oligodendrocyte precursors. It does, however, argue against a relationship between  $\alpha 6$  isoform switching and the migratory and proliferative phenotype of the cell, as both the migratory, proliferating oligodendrocyte precursor and the postmigratory, postmitotic oligodendrocyte express  $\alpha 6A$  and not  $\alpha 6B$ .

The  $\alpha 6$  immunoprecipitations from oligodendrocytes consistently gave a pattern of two  $\alpha 6$  bands. Western blotting of proteins from cells rapidly lysed in SDS sample buffer also showed the same pattern, arguing against handling degradation as an explanation for these two bands. Labelling of an intracellular  $\alpha 6$  precursor seems unlikely due to the impermeant nature of the biotin label. Another possibility is that the lower band is contributed by contaminating type-1 astrocytes in the culture, as we found that the  $\alpha 6$  band expressed by astrocytes co-migrated with the lower oligodendroglial  $\alpha 6$  band. This seems unlikely for two reasons. First, there are negligible levels of type-1 astrocytes seen in these cultures, as determined by their fibroblast morphology and immunolabelling by an antiserum against glial fibrillary acidic protein (GFAP). Second, experiments with an oligodendroglial cell line CG4 (Louis et al., 1992, kindly provided by Dr J. C. Louis) also show expression of the lower  $\alpha 6$  band in the cultures using this cell line (R. M. and C. ff-C., unpublished observations). Therefore we conclude that oligodendroglia express two forms of  $\alpha 6$  and that there is a further level of heterogeneity within the  $\alpha 6$  subunit in addition to the alternative splicing responsible for  $\alpha 6A$  and  $\alpha 6B$ .

Oligodendrocytes also express another major class of integrins, the  $\alpha v$  family.  $\alpha v$  has been described in association with a wide range of  $\beta$  subunits ( $\beta 1$ ,  $\beta 3$ ,  $\beta 5$ ,  $\beta 6$  and  $\beta 8$ ) (Bodary and McLean, 1990; Vogel et al., 1990; Cheresch and Spiro, 1987; Cheresch et al., 1989; Ramaswamy and Hemler, 1990; Busk et al., 1992; Moyle et al., 1991) and this range of subunits makes  $\alpha v$  unique amongst integrin  $\alpha$  chains. Interestingly, we found that the  $\beta$  subunit association of  $\alpha v$  in oligodendroglia changes with differentiation. Precursor cells express  $\alpha v\beta 1$  and low levels of  $\alpha v\beta 5$  whereas oligodendrocytes express much higher levels of  $\alpha v\beta 5$  while  $\alpha v\beta 1$  is barely detectable. The developmental time course that we performed shows this change to occur over 26 days in secondary culture, with the increase in  $\alpha v\beta 5$  seen by 7 days while  $\alpha v\beta 1$  decreases over the entire time in culture. The low levels of  $\alpha v\beta 5$  observed in the precursor cell cultures might reflect either expression by the precursors of low levels of  $\alpha v\beta 5$  or alternatively  $\alpha v\beta 5$  on the small contaminating population of oligodendrocytes. Either interpretation is consistent with our conclusion from these experiments that differentiation is associated with a switch of  $\alpha v$ -associated  $\beta$  subunits from  $\beta 1$  to  $\beta 5$ . In addition to  $\alpha v\beta 1$  and  $\alpha v\beta 5$  a third  $\alpha v$  integrin is expressed on both oligodendrocyte precursors and differentiated oligodendrocytes. This integrin was present at higher levels than either  $\alpha v\beta 1$  or  $\alpha v\beta 5$ . As explained in the results,

we have shown that  $\alpha v\beta 3$  is present on oligodendroglial cells and represents a likely candidate for an extra  $\alpha v$  integrin. However in our hands two anti- $\beta 3$  antibodies produced only faint bands raising the possibility that another novel integrin  $\beta$ -subunit is also expressed on oligodendrocytes.

Our results contradict those of Malek-Hedayat and Rome who examined integrins on oligodendroglia by  $I^{125}$  surface-labelling prior to immunoprecipitation experiments. They found no evidence for  $\alpha v$  integrins and did not examine  $\alpha 6$  integrins. They did, however, find  $\beta 1$  associated with the integrin  $\alpha 8$  subunit. In our hands, an  $\alpha 8$  antiserum did not immunoprecipitate any bands and an immunodepletion experiment with  $\alpha 6$  removed most, if not all,  $\beta 1$ -associated integrins from oligodendrocytes. This makes it unlikely that significant levels of other  $\beta 1$  integrins are present on oligodendrocytes. We cannot explain this discrepancy; however the oligodendrocytes used in the two studies were grown using different culture conditions. Malek-Hedayat and Rome used 5% calf serum to grow their oligodendrocytes while we used low serum (0.5% FCS) media for our secondary culture. It is possible that the growth factors present in serum alter the integrin expression of oligodendroglial cells in secondary culture.

#### Potential ECM ligands for oligodendroglial cells

The definition of the pattern of integrin expression on oligodendroglial cells allows predictions to be made as to the extracellular matrix ligands likely to interact with these receptors.  $\alpha 6$  integrins are receptors for the laminin family of molecules (Sonnenberg et al., 1988).  $\alpha v$  integrins are more promiscuous, with fibronectin ( $\alpha v\beta 1$ ,  $\alpha v\beta 6$ ), thrombospondin ( $\alpha v\beta 3$ ), tenascin ( $\alpha v\beta 3$ ) and vitronectin ( $\alpha v\beta 1$ ,  $\alpha v\beta 3$ ,  $\alpha v\beta 5$ ) identified among other ligands (Vogel et al., 1990; Busk et al., 1992; Lawler and Hynes, 1989; Prieto et al., 1993; Sriramarao et al., 1993; Bodary and McLean, 1990; Cheresh and Spiro, 1987; Cheresh et al., 1989). As we would have predicted, we have found that oligodendrocyte precursors bind to and extend processes on both vitronectin and laminin (R. M. and C. ff-C., unpublished observations). Interestingly, a previous study found that oligodendrocyte precursors, but not oligodendrocytes also bind to fibronectin (Payne and Lemmon, 1993). Given that  $\alpha v\beta 1$  is a fibronectin receptor, this result would be predicted from our data –  $\alpha v\beta 1$  being lost on oligodendrocytes as differentiation proceeds. The functional significance of this is unclear, as fibronectin is expressed only transiently in the central nervous system and appears to be absent from areas at the time of myelination later in development (Sheppard et al., 1991). In contrast, laminins, thrombospondin, tenascin and vitronectin have all been identified in the developing CNS in regions that will develop into myelinated tracks. Vitronectin is present in the early stages of development (E5-6) in chick optic nerve and retina (Neugebauer et al., 1991), although the pattern of vitronectin expression later in development has not yet been addressed. Thrombospondin and tenascin are present in developing white matter within the cerebellum (O'Shea et al., 1990; Bartsch et al., 1992). Laminin is present in the early developing central nervous system (Liesi, 1985) and has also been described at later stages within the optic nerve during the phase of oligodendroglial cell migration (McLoon et al., 1988). The laminins constitute an extensive family of extracellular matrix molecules and the recent observation that one member of this

family, merosin, is present in developing white matter tracts in the chick (N. Morissette and S. Carbonetto, Society for Neuroscience Abstracts, 1993) suggest that this form of laminin may be an important ligand for  $\alpha 6\beta 1$  on oligodendroglial cells. The function of the extracellular matrix in CNS development is poorly understood; however, our evidence that oligodendroglial cells express integrin receptors for at least four classes of extracellular matrix molecules present in the central nervous system does strengthen the evidence that cell-ECM interactions play a significant role in the formation of the CNS.

#### What is the role of integrins in oligodendrocyte differentiation and myelin formation?

Differentiation of oligodendroglial cells involves three different events: cessation of migration, ending of proliferation and subsequent expression of myelin-specific gene products, associated with the formation of the myelin sheath. We found that migratory, proliferating precursor cells express  $\alpha v\beta 1$  whereas postmigratory, postmitotic differentiated oligodendrocytes upregulate  $\alpha v\beta 5$  while  $\alpha v\beta 1$  disappears. In addition, both precursor cells and differentiated oligodendrocytes express  $\alpha 6\beta 1$  and other  $\alpha v$  integrins including  $\alpha v\beta 3$ . Based on the work of others examining the functional consequences of the expression of different  $\alpha v$  integrins, we propose that the switch from  $\alpha v\beta 1$  to  $\alpha v\beta 5$  is an essential part of the molecular mechanism responsible for the differentiation of oligodendrocyte precursor cells. By constructing  $\beta 1$  chimeric integrins expressing either  $\beta 1$  (wild type) or  $\beta 5$  cytoplasmic domains, Pasqualini and Hemler (1994) showed that CHO cells expressing  $\alpha 5\beta 1$  showed increased proliferation on fibronectin substrates, while cells expressing  $\alpha 5\beta 1/5$  failed to do so. This suggests that  $\beta 1$  but not  $\beta 5$  cytoplasmic domains support increased cell proliferation. Both integrin subunits supported cell adhesion equally, suggesting that the different cytoplasmic domains play an instructive role in controlling cell proliferation by stimulating different signal transduction pathways within the cells. The observed switch from  $\alpha v\beta 1$  to  $\alpha v\beta 5$  in oligodendrocyte precursors might therefore represent a critical step in the change to a postproliferative phenotype. If oligodendroglia behave in the same manner as the CHO cells analysed by Pasqualini and Hemler (1994), then the upregulation of  $\alpha v\beta 5$  would be expected to reduce proliferation. This would in turn induce differentiation in the precursor cell, as tissue culture studies have illustrated that oligodendrocyte precursors constitutively differentiate into oligodendrocytes once proliferation has ceased (Temple and Raff, 1985, for review see Barres and Raff, 1994). In such a model, integrins will therefore play a key instructive role in the control of oligodendrocyte differentiation.

The observations of Rome and colleagues that RGD peptides inhibit the expression of myelin-specific genes by oligodendrocytes (Cardwell and Rome, 1988b, Malek-Hedayat and Rome, 1994) suggests a further role for integrins in myelination. Our results suggest a molecular mechanism for this observation, as RGD peptides block all the  $\alpha v$  integrins that we have characterized on oligodendroglial cells (Koivunen et al., 1993). We propose, therefore, that once differentiation has occurred the interaction of oligodendrocytes with the extracellular matrix via  $\alpha v$  integrins is essential for the formation of myelin.

Signal transduction of integrins is subunit specific, such that different  $\beta$  subunits associated with  $\alpha v$  and binding the same



ligand (vitronectin) can transduce different signals to the inside of the cell (Leavesley et al., 1992). This evidence suggests that the switching of  $\beta$  subunits that we have observed during the differentiation of oligodendroglial cells may play important instructive roles in the regulation of cell behaviour. Such switching of  $\beta$  subunits may be an important general mechanism for the regulation of cell behaviour during development in a wide range of cell types. Our results have enabled us to generate predictions as to the effects of switching these different  $\beta$  subunits. We are now in a position to take advantage of the ability to analyse oligodendroglial cell behaviour either in vitro or in vivo following transplantation so as to test these predictions

We would like to thank Drs Tarone, Quaranta, Cheresch, Kennel, Sonnenberg, Pytela, Schnapp, Venstrom, Hynes and Horton for the generous gifts of antibodies that made this study possible. We are also grateful to Dr James Fawcett for advice on the oligodendrocyte cultures, Dr Rudi Juliano and Dr Nick Brown for much helpful discussion and to our colleagues in the laboratory for comments on the manuscript. The work was supported by the Wellcome Trust via a senior clinical fellowship to C. ff-C. and a prize studentship to R. M.

## REFERENCES

- Adams, J. C. and Watt, F. M. (1993). Regulation of development and differentiation by the extracellular matrix. *Development* **117**, 1183-98
- Armstrong, R. C., Harvath, L. and Dubois-Dalcq, M. E. (1990). Type 1 astrocytes and oligodendrocyte-type 2 astrocyte glial progenitors migrate toward distinct molecules. *J. Neuroscience Res.* **27**, 400-407.
- Bartsch, S., Bartsch, U., Dorries, U., Faissner, A., Weller, A., Ekblom, P. and Schachner, M. (1992) Expression of tenascin in the developing and adult cerebellar cortex. *J. Neurosci.* **12**, 736-749.
- Barres, B. A., Hart, I. K., Coles, H. S. R., Burne, J. F., Voyvodic, J. T., Richardson, W. D. and Raff, M. C. (1992). Cell death and control of cell survival in the oligodendrocyte lineage. *Cell* **70**, 31-46.
- Barres, B. A. and Raff, M. C. (1994). Control of oligodendrocyte number in the developing rat optic nerve. *Neuron* **12**, 935-942.
- Bodary, S. C. and McLean, J. W. (1990). The integrin  $\beta 1$  subunit associates with the vitronectin receptor  $\alpha v$  subunit to form a novel vitronectin receptor in a human embryonic kidney cell line. *J. Biol. Chem.* **265**, 5938-5941.
- Bossy, B., Bossy-Wetzel, E. and Reichardt, L. F. (1991). Characterization of the integrin  $\alpha 8$  subunit: a new integrin  $\beta 1$ -associated subunit, which is prominently expressed on axons and on cells in contact with basal laminae in chick embryos. *EMBO J.* **10**, 2375-2385.
- Busk, M., Pytela, R. and Sheppard, D. (1992). Characterization of the integrin  $\alpha v \beta 6$  as a fibronectin-binding protein. *J. Biol. Chem.* **267**, 5790-5796.
- Cardwell, M. C. and Rome, L. H. (1988a). Evidence that an RGD-dependent receptor mediates the binding of oligodendrocytes to a novel ligand in a glial-derived matrix. *J. Cell Biol.* **107**, 1541-1549.
- Cardwell, M. C. and Rome, L. H. (1988b). RGD-containing peptides inhibit the synthesis of myelin-like membrane by cultured oligodendrocytes. *J. Cell Biol.* **107**, 1551-1559.
- Cheresch, D. A., Smith, J. W., Cooper, H. M. and Quaranta, V. (1989). A novel vitronectin receptor integrin ( $\alpha v \beta x$ ) is responsible for distinct adhesive properties of carcinoma cells. *Cell* **57**, 59-69.
- Cheresch, D. A. and Spiro, R. C. (1987). Biosynthetic and functional properties of an Arg-Gly-Asp-directed receptor involved in human melanoma cell adhesion to vitronectin, fibrinogen and Von Willebrand factor. *J. Biol. Chem.* **262**, 17703-17711.
- Cohen, J., Burne, J. F., Winter, J. and Bartlett, P. F. (1986). Retinal ganglion cells lose response to laminin with maturation. *Nature* **322**, 465-467.
- Cooper, H. M., Tamura, R. N. and Quaranta, V. (1991). The major laminin receptor of mouse embryonic stem cells is a novel isoform of the  $\alpha 6 \beta 1$  integrin. *J. Cell Biol.* **115**, 843-850.
- de Curtis, I., Quaranta, V., Tamura, R. N. and Reichardt, L. F. (1991). Laminin receptors in the retina: sequence analysis of the chick integrin  $\alpha 6$  subunit. Evidence for transcriptional and posttranslational regulation. *J. Cell Biol.* **113**, 405-416.
- Diamond, M. S. and Springer, T. A. (1994). The dynamic regulation of integrin adhesiveness. *Curr. Biol.* **4**, 506-517.
- Dubois-Dalcq, M., Behar, T., Hudson, L. and Lazzarini, R. A. (1986). Emergence of three myelin proteins in oligodendrocytes cultured without neurones. *J. Cell Biol.* **102**, 384-392.
- Einheber, S., Milner, T. A., Giancotti, F. and Salzer, J. L. (1993). Axonal regulation of Schwann cell integrin expression suggests a role for  $\alpha 6 \beta 4$  in myelination. *J. Cell Biol.* **123**, 1223-1236.
- Feltri, M. L., Scherer, S. S., Nemni, R., Kamholz, J., Vogelbacker, H., Scott, M. O., Canal, N., Quaranta, V. and Wrabetz, L. (1994).  $\beta 4$  integrin expression in myelinating Schwann cells is polarized, developmentally regulated and axonally dependent. *Development* **120**, 1287-1301.
- Galileo, D. S., Majors, J., Horwitz, A. F. and Sanes, J. R. (1992). Retrovirally introduced antisense integrin RNA inhibits neuroblast migration in vivo. *Neuron* **9**, 1117-1131.
- Helfrich, M. H., Nesbitt, S. A. and Horton, M. A. (1992) Integrins on rat osteoclasts: characterization of two monoclonal antibodies (F4 and F11) to rat  $\beta 3$ . *J. Bone and Min. Res.* **7**, 345-351
- Hemler, M. E. (1990). VLA proteins in the integrin family: Structures, functions and their role on leucocytes. *Ann. Rev. Immunol.* **8**, 365-400.
- Hemler, M. E., Crouse, C. and Sonnenberg, A. (1989). Association of the VLA  $\alpha 6$  subunit with a novel protein. A possible alternative to the common VLA  $\beta 1$  subunit on certain cell lines. *J. Biol. Chem.* **264**, 6529-6535.
- Hemler, M. E., Crouse, C., Takada, Y. and Sonnenberg, A. (1988). Multiple very late antigen (VLA) heterodimers on platelets. Evidence for distinct VLA-2, VLA-5 (fibronectin receptor) and VLA-6 structures. *J. Biol. Chem.* **264**, 6529-6535.
- Hierck, B. P., Thorsteinstottir, S., Niessen, C., Freund, E., Iperen, L. V., Feyen, A., Hogervorst, F., Poelmann, R. E., Mummery, C. L. and Sonnenberg, A. (1993). Variants of the  $\alpha 6 \beta 1$  laminin receptor in early murine development: Distribution, molecular cloning and chromosomal localization of the mouse integrin  $\alpha 6$  subunit. *Cell Adhesion and Communication* **1**, 33-53.
- Hogervorst, F., Admiraal, L. G., Niessen, C., Kuikman, I., Janssen, H., Daams, H. and Sonnenberg, A. (1993). Biochemical characterization and tissue distribution of the A and B variants of the integrin  $\alpha 6$  subunit. *J. Cell Biol.* **121**, 179-191.
- Hogervorst, F., Kuikman, I., Van Kessel, A. D. and Sonnenberg, A. (1991). Molecular cloning of the human  $\alpha 6$  integrin subunit. Alternative splicing of  $\alpha 6$  mRNA and chromosomal localization of the  $\alpha 6$  and  $\beta 4$  genes. *Eur. J. Biochem.* **199**, 425-433.
- Huxley, A. F. and Stampfli, R. (1949). Evidence for saltatory conduction in peripheral myelinated nerve fibres. *J. Physiol.* **108**, 315-339.
- Hynes, R. O. (1987). Integrins: a family of cell surface receptors. *Cell* **48**, 549-554.
- Hynes, R. O. (1992). Integrins: Versatility, modulation and signaling in cell adhesion. *Cell* **69**, 11-25.
- Hynes, R. O. and Lander, A. D. (1992). Contact and adhesive specificities in the associations, migrations, and targeting of cells and axons. *Cell* **68**, 303-322.
- Kajiji, S., Tamura, R. N. and Quaranta, V. (1989). A novel integrin ( $\alpha \beta 4$ ) from human epithelial cells suggests a fourth family of integrin adhesion receptors. *EMBO J.* **8**, 673-680.
- Kennel, S. J., Foute, L. J., Falcioni, R., Sonnenberg, A., Stringer, C. D., Crouse, C. and Hemler, M. E. (1989). Analysis of the tumour associated antigen TSP-180. Identity with  $\alpha 6 \beta 4$  in the integrin superfamily. *J. Biol. Chem.* **264**, 15515-15521.
- Kiernan, B. W. and ffrench-Constant, C. (1993). Oligodendrocyte precursor (O-2A progenitor) cell migration; a model system for the study of cell migration in the developing central nervous system. *Development* **1993 Supplement**, 219-225.
- Koivunen, E., Gay, D. A. and Ruoslahti, E. (1993). Selection of peptides binding to the  $\alpha 5 \beta 1$  integrin from phage display library. *J. Biol. Chem.* **268**, 20205-20210.
- Lawler, J. and Hynes, R. O. (1989). An integrin receptor on normal and thrombasthenic platelets that binds thrombospondin. *Blood* **74**, 2022-2027.
- Le Douarin, N. (1982). *The Neural Crest*. Cambridge, UK: Cambridge University Press.
- Leavesley, D. I., Ferguson, G. D., Wayner, E. A. and Cheresch, D. A. (1992). Requirement of the integrin  $\beta 3$  subunit for carcinoma cell spreading or migration on vitronectin and fibrinogen. *J. Cell Biol.* **117**, 1101-1107.

- Liesi, P. (1985). Do neurons in the vertebrate CNS migrate on laminin? *EMBO J.* **4**, 1163-1170.
- Louis, J. C., Magal, E., Muir, D., Manthorpe, M. and Varon, S. (1992). CG-4, a new bipotential glial cell line from rat brain, is capable of differentiating in vitro into either mature oligodendrocytes or type-2 astrocytes. *J. Neuroscience Res.* **31**, 193-204.
- Malek-Hedayat, S. and Rome, L. H. (1994). Expression of a  $\beta 1$ -related integrin by oligodendroglia in primary culture: evidence for a functional role in myelination. *J. Cell Biol.* **124**, 1039-1046.
- Marcantonio, E. E. and Hynes, R. O. (1988). Antibodies to the conserved cytoplasmic domain of the integrin  $\beta 1$  subunit react with proteins in vertebrates, invertebrates and fungi. *J. Cell Biol.* **106**, 1765-1772.
- Marusich, M. F. and Weston, J. A. (1991). Development of the neural crest. *Curr. Opin. Genet. Dev.* **1**, 221-229.
- McCarthy, K. D. and De Vellis, J. (1980). Preparation of separate astroglial and oligodendroglia cell cultures from rat cerebral tissue. *J. Cell Biol.* **85**, 890-902.
- McLoon, S. C., McLoon, L. K., Palm, S. L. and Furcht, L. T. (1988). Transient expression of laminin in the optic nerve of the developing rat. *J. Neurosci.* **8**, 1981-1990.
- Moyle, M., Napier, M. A. and McLean, J. W. (1991). Cloning and expression of a divergent integrin subunit  $\beta 8$ . *J. Biol. Chem.* **266**, 19650-19658.
- Neugebauer, K. M., Emmett, C. J., Venstrom, K. A. and Reichardt, L. F. (1991). Vitronectin and thrombospondin promote retinal neurite outgrowth: developmental regulation and role of integrins. *Neuron* **6**, 345-358.
- Neugebauer, K. M. and Reichardt, L. F. (1991). Cell surface regulation of  $\beta 1$ -integrin activity on developing retinal neurons. *Nature* **350**, 68-71.
- Niessen, C. M., Cremona, O., Daams, H., Ferraresi, S., Sonnenberg, A. and Marchisio, P. C. (1994). Expression of the integrin  $\alpha 6 \beta 4$  in peripheral nerves: localization in Schwann and perineurial cells and different variants of the  $\beta 4$  subunit. *J. Cell Sci.* **107**, 543-552.
- Noble, M., Murray, K., Stroobant, P., Waterfield, M. D. and Riddle, P. (1988). Platelet-derived growth factor promotes division and motility and inhibits premature differentiation of the oligodendrocyte/type-2 astrocyte progenitor cell. *Nature* **333**, 560-562.
- O'Shea, K. S., Rheinheimer, J. S. T. and Dixit, V. M. (1990). Deposition and role of thrombospondin in the histogenesis of the cerebellar cortex. *J. Cell Biol.* **110**, 1275-1283.
- Palmer, E. L., Ruegg, C., Ferrando, R., Pytela, R. and Sheppard, D. (1993). Sequence and tissue distribution of the integrin  $\alpha 9$  subunit, a novel partner of  $\beta 1$  that is widely distributed in epithelia and muscle. *J. Cell Biol.* **123**, 1289-1297.
- Pasqualini, R. and Hemler, M. E. (1994). Contrasting roles for integrin  $\beta 1$  and  $\beta 5$  cytoplasmic domains in subcellular localization, cell proliferation and cell migration. *J. Cell Biol.* **125**, 447-460.
- Payne, H. R. and Lemmon, V. (1993). Glial cells of the O-2A lineage bind preferentially to N-Cadherin and develop distinct morphologies. *Dev. Biol.* **159**, 595-607.
- Plow, E. F., Pierschbacher, M. D., Ruoslahti, E., Marguerie, G. A. and Ginsberg, M. H. (1985). The effect of Arg-Gly-Asp-containing peptides on fibrinogen and von Willebrand factor binding to platelets. *Proc. Nat. Acad. Sci. USA* **82**, 8057-8061.
- Prieto, A. L., Edelman, G. M. and Crossin, K. L. (1993). Multiple integrins mediate cell attachment to cytotactin/tenascin. *Proc. Nat. Acad. Sci. USA* **90**, 10154-10158.
- Pringle, N. P. and Richardson, W. D. (1993). A singularity of PDGF alpha-receptor expression in the dorsoventral axis of the neural tube may define the origin of the oligodendroglial lineage. *Development* **117**, 525-533.
- Pytela, R., Pierschbacher, M. D. and Ruoslahti, E. (1985a). A 125/115-kDa cell surface receptor specific for vitronectin interacts with the arginine-glycine-aspartic acid adhesion sequence derived from fibronectin. *Proc. Nat. Acad. Sci. USA* **82**, 5766-5770.
- Pytela, R., Pierschbacher, M. D. and Ruoslahti, E. (1985b). Identification and isolation of a 140kDa cell surface glycoprotein with properties expected of a fibronectin receptor. *Cell* **40**, 191-198.
- Raff, M. C., Abney, E. R. and Fok-Seang, J. (1985). Reconstitution of a developmental clock in vitro: a critical role for astrocytes in the timing of oligodendrocyte differentiation. *Cell* **42**, 61-69.
- Raff, M. C., Mirsky, R., Fields, R. P., Lisak, S. H., Dorfman, S. H., Silberberg, D. H., Gregson, N. A., Liebowitz, S. and Kennedy, M. C. (1978). Galactocerebroside is a specific cell-surface antigenic marker for oligodendrocytes in culture. *Nature* **274**, 813-816.
- Ramaswamy, H. and Hemler, M. E. (1990). Cloning, primary structure and properties of a novel human integrin  $\beta$  subunit. *EMBO J.* **9**, 1561-1568.
- Ranscht, B., Clapshaw, P. A., Price, J., Noble, M. and Seifert, W. (1982). Development of oligodendrocytes and Schwann cells studied with a monoclonal antibody against galactocerebroside. *Proc. Natl. Acad. Sci. USA* **79**, 2709-2713.
- Ruoslahti, E. (1991). Integrins. *J. Clin. Invest.* **87**, 1-5.
- Sheppard, A. M., Hamilton, S. K. and Pearlman, A. L. (1991) Changes in the distribution of extracellular matrix components accompany early morphogenetic changes of mammalian cortical development. *J. Neurosci.* **11**, 3928-3942.
- Sheppard, D., Rozzo, C., Starr, L., Quaranta, V., Erle, D. J. and Pytela, R. (1990). Complete amino acid sequence of a novel integrin  $\beta$  subunit ( $\beta 6$ ) identified in epithelial cells using the polymerase chain reaction. *J. Biol. Chem.* **265**, 11502-11507.
- Small, R. K., Riddle, P. and Noble, M. (1987). Evidence for migration of oligodendrocyte-type-2 astrocyte progenitor cells into the developing rat optic nerve. *Nature* **328**, 155-7.
- Song, W. K., Wang, W., Foster, R. F., Bielser, D. A. and Kaufman, S. J. (1992). H36-alpha 7 is a novel integrin alpha chain that is developmentally regulated during skeletal myogenesis. *J. Cell Biol.* **117**, 643-657.
- Sonnenberg, A., Janssen, H., Hogervorst, F., Calafat, J. and Hilgers, J. (1987) A complex of platelet glycoproteins Ic and IIa identified by a rat monoclonal antibody. *J. Biol. Chem.* **262**, 10376-383.
- Sonnenberg, A., Modderman, P. W. and Hogervorst, F. (1988). Laminin receptor on platelets is the integrin VLA-6. *Nature* **336**, 487-489.
- Sriramarao, P., Mendler, M. and Bourdon, M. A. (1993) Endothelial cell attachment and spreading on human tenascin is mediated by  $\alpha 2 \beta 1$  and  $\alpha \nu \beta 3$  integrins. *J. Cell Sci.* **105**, 1001-1012.
- Tamura, R. N., Cooper, H. M., Collo, G. and Quaranta, V. (1991). Cell type-specific integrin variants with alternative  $\alpha$  chain cytoplasmic domains. *Proc. Nat. Acad. Sci. USA* **88**, 10183-10187.
- Tawil, N., Wilson, P. and Carbonetto, S. (1993). Integrins in point contacts mediate cell spreading: factors that regulate integrin accumulation in point contacts vs. focal contacts. *J. Cell Biol.* **120**, 261-271.
- Temple, S. and Raff, M. C. (1985). Differentiation of a bipotential glial progenitor cell in single cell microculture. *Nature* **313**, 223-225.
- Vogel, B. E., Tarone, G., Giancotti, F. G., Gailit, J. and Ruoslahti, E. (1990). A novel fibronectin receptor with an unexpected subunit composition ( $\alpha \nu \beta 1$ ). *J. Biol. Chem.* **265**, 5934-5937.
- Warf, B. C., Fok-Seang, J. and Miller, R. H. (1991). Evidence for the ventral origin of oligodendrocyte precursors in the rat spinal cord. *J. Neuroscience* **11**, 2477-2488.
- Wayner, E. A., Orlando, R. A. and Cheresch, D. A. (1991) Integrins  $\alpha \nu \beta 3$  and  $\alpha \nu \beta 5$  contribute to cell attachment to vitronectin but differentially distribute on the cell surface. *J. Cell Biol.* **113**, 919-929.
